# Supplementary material for: Approximate maximum likelihood estimation for stochastic chemical kinetics
Source: Springer Nature journal article supplement (doi:10.1186/1687-4153-2012-9), 2012-07-18
Supplement: 13637_2012_20_MOESM10_ESM.pdf [file 13637_2012_20_MOESM10_ESM.pdf]

**Table 1 - Different approximations of the standard deviations of the estimators**

| Method                                | $K$ | $R$ | $c_1$                    | $c_2$                  | $c_3$                  | $\sigma$               | mRNA(0)              |
|---------------------------------------|-----|-----|--------------------------|------------------------|------------------------|------------------------|----------------------|
| Fisher inf. matrix<br>100 experiments | 10  | 10  | 0.0545104<br>0.0358142   | 0.561963<br>0.198700   | 0.935324<br>0.262223   | 0.364339<br>0.392884   | 0.639471<br>0.490305 |
| Fisher inf. matrix<br>100 experiments | 20  | 20  | 0.0324508<br>0.0304157   | 0.299487<br>0.167431   | 0.451476<br>0.287471   | 0.174095<br>0.134506   | 0.594820<br>0.436059 |
| Fisher inf. matrix<br>100 experiments | 50  | 50  | 0.0139185<br>0.0140331   | 0.110709<br>0.078516   | 0.152229<br>0.146232   | 0.0440282<br>0.0353837 | 0.238033<br>0.183888 |
| Fisher inf. matrix<br>100 experiments | 100 | 100 | 0.00866066<br>0.00691956 | 0.0548249<br>0.0430123 | 0.0728129<br>0.0641821 | 0.0182564<br>0.0217544 | 0.208469<br>0.187968 |
