# Supplementary material for: Approximate maximum likelihood estimation for stochastic chemical kinetics
Source: Springer Nature journal article supplement (doi:10.1186/1687-4153-2012-9), 2012-07-18
Supplement: 13637_2012_20_MOESM11_ESM.pdf [file 13637_2012_20_MOESM11_ESM.pdf]

|                      |                   |                               |
|----------------------|-------------------|-------------------------------|
| PaxDna               | $\xrightarrow{p}$ | PaxDna + PaxProt              |
| PaxProt              | $\xrightarrow{d}$ | $\emptyset$                   |
| PaxDna + DeltaProt   | $\xrightarrow{b}$ | PaxDnaDeltaProt               |
| PaxDnaDeltaProt      | $\xrightarrow{u}$ | PaxDna + DeltaProt            |
| MafADna              | $\xrightarrow{p}$ | MafADna + MafAProt            |
| MafAProt             | $\xrightarrow{d}$ | $\emptyset$                   |
| MafADna + PaxProt    | $\xrightarrow{b}$ | MafADnaPaxProt                |
| MafADnaPaxProt       | $\xrightarrow{u}$ | MafADna + PaxProt             |
| MafADnaPaxProt       | $\xrightarrow{p}$ | MafADnaPaxProt + MafAProt     |
| MafADna + MafAProt   | $\xrightarrow{b}$ | MafADnaMafAProt               |
| MafADnaMafAProt      | $\xrightarrow{u}$ | MafADna + MafAProt            |
| MafADnaMafAProt      | $\xrightarrow{p}$ | MafADnaMafAProt + MafAProt    |
| MafADna + DeltaProt  | $\xrightarrow{b}$ | MafADnaDeltaProt              |
| MafADnaDeltaProt     | $\xrightarrow{u}$ | MafADna + DeltaProt           |
| DeltaDna             | $\xrightarrow{p}$ | DeltaDna + DeltaProt          |
| DeltaProt            | $\xrightarrow{d}$ | $\emptyset$                   |
| DeltaDna + PaxProt   | $\xrightarrow{b}$ | DeltaDnaPaxProt               |
| DeltaDnaPaxProt      | $\xrightarrow{u}$ | DeltaDna + PaxProt            |
| DeltaDnaPaxProt      | $\xrightarrow{p}$ | DeltaDnaPaxProt + DeltaProt   |
| DeltaDna + MafAProt  | $\xrightarrow{b}$ | DeltaDnaMafAProt              |
| DeltaDnaMafAProt     | $\xrightarrow{u}$ | DeltaDna + MafAProt           |
| DeltaDna + DeltaProt | $\xrightarrow{b}$ | DeltaDnaDeltaProt             |
| DeltaDnaDeltaProt    | $\xrightarrow{u}$ | DeltaDna + DeltaProt          |
| DeltaDnaDeltaProt    | $\xrightarrow{p}$ | DeltaDnaDeltaProt + DeltaProt |
