# Supplementary material for: Approximate maximum likelihood estimation for stochastic chemical kinetics
Source: Springer Nature journal article supplement (doi:10.1186/1687-4153-2012-9), 2012-07-18
Supplement: 13637_2012_20_MOESM12_ESM.pdf [file 13637_2012_20_MOESM12_ESM.pdf]

| protein   | K | estimated<br>rate constant | standard<br>deviation | time<br>(hours) | observed<br>proteins |
|-----------|---|----------------------------|-----------------------|-----------------|----------------------|
| PaxProt   | 1 | 10.0                       | 13.6159               | 7.45            | MafAProt, DeltaProt  |
|           | 5 | 0.5693                     | 2.1842                | 6.34            |                      |
| MafAProt  | 1 | 4.9998                     | 4.9884                | 11.62           | PaxProt, DeltaProt   |
|           | 5 | 5.4853                     | 2.3873                | 13.86           |                      |
| DeltaProt | 1 | 2.5453                     | 1.8075                | 4.35            | PaxProt, MafAProt    |
|           | 5 | 5.3646                     | 1.4682                | 12.39           |                      |
