# Supplementary material for: Approximate maximum likelihood estimation for stochastic chemical kinetics
Source: Springer Nature journal article supplement (doi:10.1186/1687-4153-2012-9), 2012-07-18

$\sigma_1$ 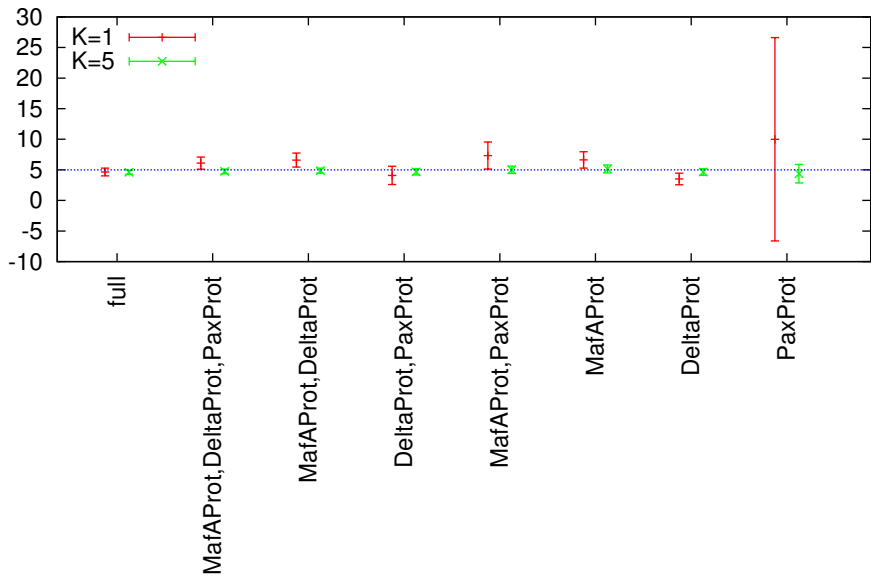

Supplement: 13637_2012_20_MOESM21_ESM.pdf [file 13637_2012_20_MOESM21_ESM.pdf]
